# Supplementary material
Source: MDPI journal article supplement (https://www.mdpi.com/2571-8789/3/3/60)
Supplement: s1 [file s1]

Supplementary Material for

# Iron Redox Reactions Can Drive Microtopographic Variation in Upland Soil Carbon Dioxide and Nitrous Oxide Emissions

Contents of this file

Figures S1, S2, S3, and S4

Tables S1, and S2

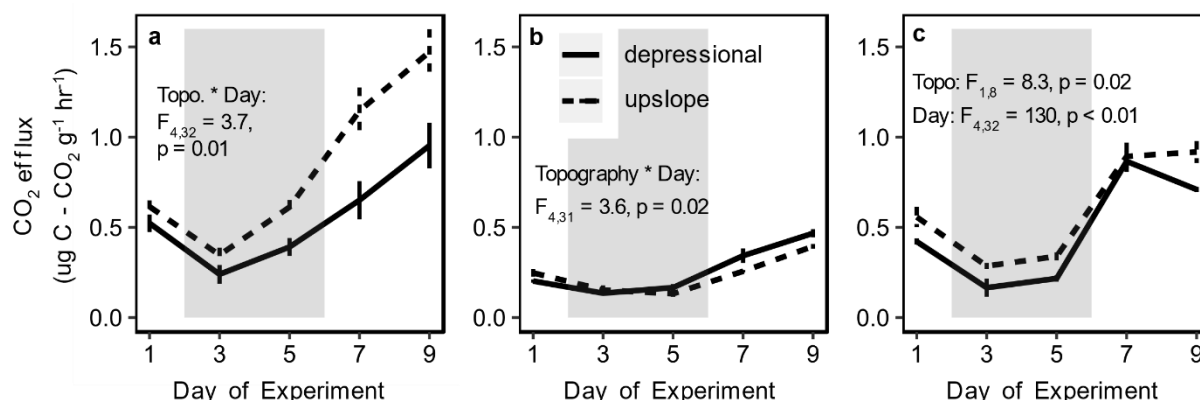

**Figure S1.** Soil CO<sub>2</sub> emissions (mean  $\pm$  SE,  $n = 5$ ) from unamended control soils from the South Farms (a), the Energy Farm (b), and Cardinal Road (c) over the course of the early season experiment. Solid lines represent emissions from depressive soils, and dotted lines represent emissions from upslope soils. Shaded areas represent when the soil cores were flooded. Results from ANOVAs run on linear mixed effects models are presented within each panel. Interaction effects are presented when significant interactions were detected. Otherwise, significant main effects are presented.

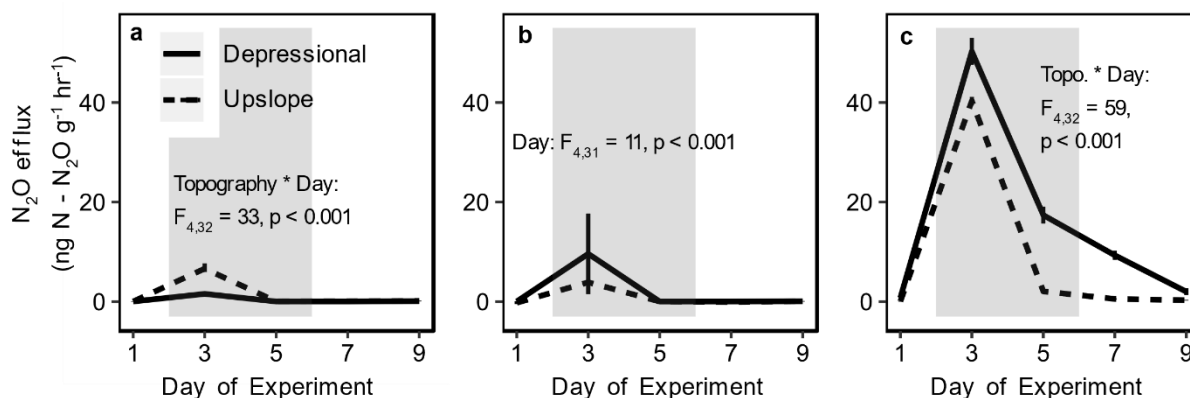

**Figure S2.** Soil N<sub>2</sub>O emissions (mean  $\pm$  SE,  $n = 5$ ) from unamended control soils from the South Farms (a), the Energy Farm (b), and Cardinal Road (c) over the course of the early season experiment. Solid lines represent emissions from depressive soils, and dotted lines represent emissions from upslope soils. Shaded areas represent when the soil cores were flooded. Results from ANOVAs run on linear

mixed effects models are presented within each panel. Interaction effects are presented when significant interactions were detected. Otherwise, significant main effects are presented.

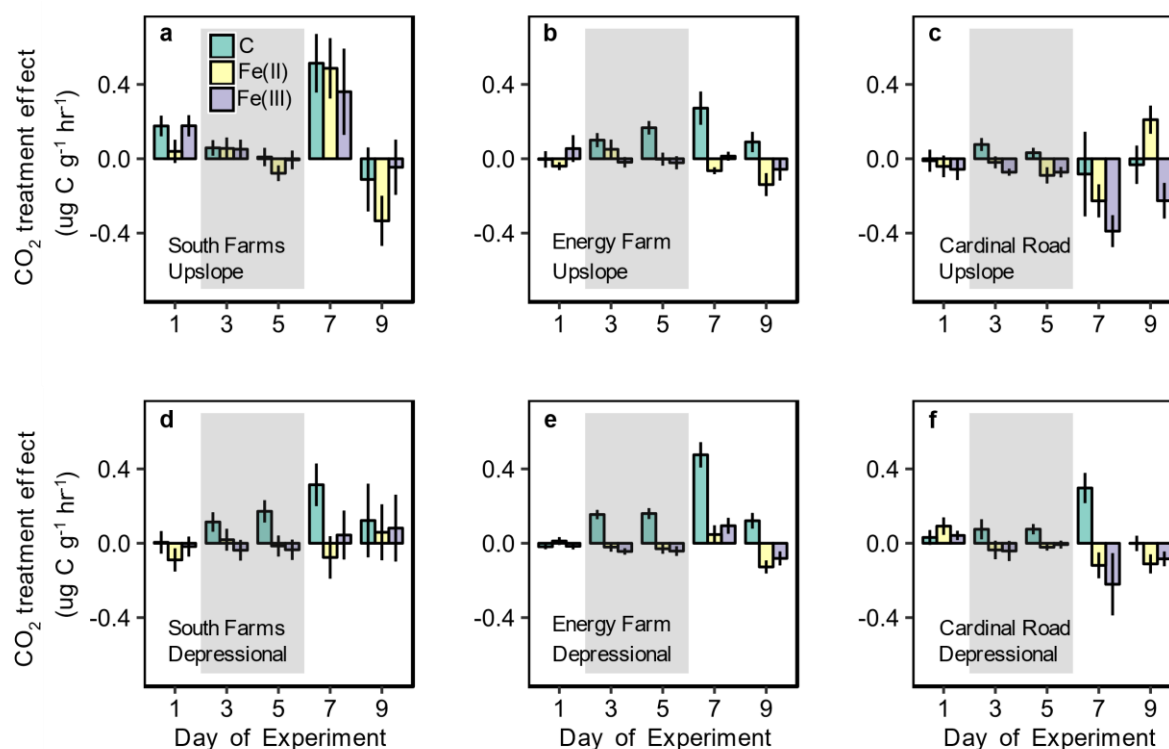

**Figure S3.** Effect size of treatments on soil CO<sub>2</sub> emissions from upslope (a,b,c) and depression (d,e,f) soils from the South Farms (a,d), the Energy Farm (b,e), and Cardinal Road (c,f) during the early season experiment. The treatment effect was calculated as the difference between net CO<sub>2</sub> emissions from soil receiving a given treatment amendment compared to unamended control soils. Error bars represent propagated standard error ( $n = 5$ ) of the difference between the control and treatment means. Colors represent each treatment. Gray shading indicates when soils were flooded.

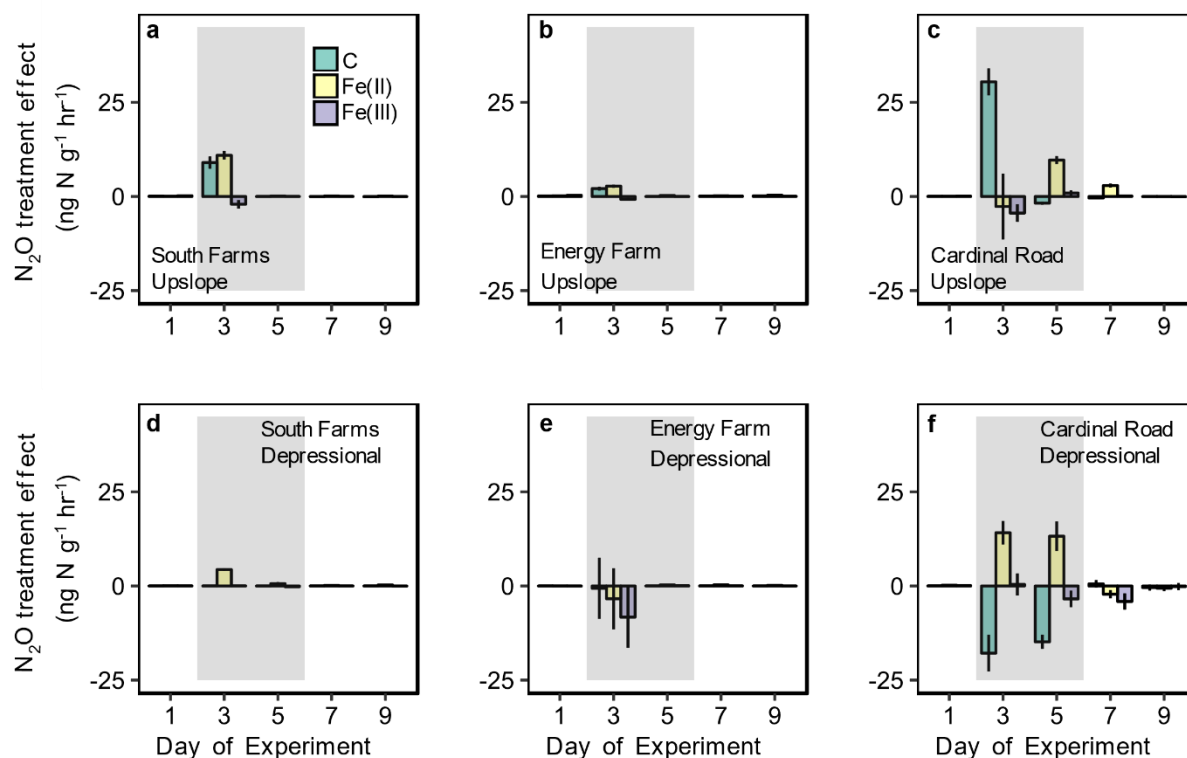

**Figure S4.** Effect size of treatments on soil  $\text{N}_2\text{O}$  emissions from upslope (a,b,c) and depressionnal (d,e,f) soils from the South Farms (a,d), the Energy Farm (b,e), and Cardinal Road (c,f) during the early season experiment. The treatment effect was calculated as the difference between net  $\text{N}_2\text{O}$  emissions from soil receiving a given treatment amendment compared to unamended control soils. Error bars represent propagated standard error ( $n = 5$ ) of the difference between the control and treatment means. Colors represent each treatment. Gray shading indicates when soils were flooded.

**Table S1.** Results from ANOVAs run on mixed effects models examining the treatment effect on soil  $\text{CO}_2$  emissions during the early season lab experiment.

| Site          | Drainage class | Degrees of freedom | F statistic | P value          |
|---------------|----------------|--------------------|-------------|------------------|
| South Farms   | upslope        | 9,48               | 2.9         | <b>0.007</b>     |
| South Farms   | depressionnal  | 9,48               | 1.8         | 0.1              |
| Energy Farm   | upslope        | 9,47               | 1.9         | 0.07             |
| Energy Farm   | depressionnal  | 9,48               | 5.1         | <b>&lt;0.001</b> |
| Cardinal Road | upslope        | 9,48               | 2.0         | 0.06             |
| Cardinal Road | depressionnal  | 9,48               | 1.9         | 0.08             |

Log transformed  $\text{CO}_2$  emissions were included as the dependent variable, treatment was the independent variable, and date was included as a random variable. Significant p-values ( $p < 0.05$ ) are presented in bold.

**Table S2.** Results from ANOVAs run on mixed effects models examining the treatment effect on soil N<sub>2</sub>O emissions during the early season lab experiment.

| Site          | Drainage class | Degrees of freedom | F statistic | P value          |
|---------------|----------------|--------------------|-------------|------------------|
| South Farms   | upslope        | 9,48               | 40          | <b>&lt;0.001</b> |
| South Farms   | depressional   | 9,48               | 21          | <b>&lt;0.001</b> |
| Energy Farm   | upslope        | 9,47               | 13          | <b>&lt;0.001</b> |
| Energy Farm   | depressional   | 9,48               | 3.3         | <b>0.003</b>     |
| Cardinal Road | upslope        | 9,48               | 12          | <b>&lt;0.001</b> |
| Cardinal Road | depressional   | 9,48               | 11          | <b>&lt;0.001</b> |

Log transformed N<sub>2</sub>O emissions were included as the dependent variable, treatment was the independent variable, and date was included as a random variable. Significant p-values ( $p < 0.05$ ) are presented in bold.
